# Supplementary material for: A Strategy for Rapid Discovery of Marker Peptides Associated with Fibrinolytic Efficacy of Pheretima aspergillum Based on Bioinformatics Combined with Parallel Reaction Monitoring
Source: MDPI journal article supplement (doi:10.3390/molecules27092651), 2022-04-20
Supplement: s1 [file s1]

# A Strategy for Rapid Discovery of Marker Peptides Associated with Fibrinolytic Efficacy of *Pheretima aspergillum* Based on Bioinformatics Combined with Parallel Reaction Monitoring

Ting-Ting Feng <sup>1,2,3</sup>, Jing-Xian Zhang <sup>1</sup>, Yong-Peng Zhang <sup>3</sup>, Jian Sun <sup>1</sup>, Hong Yu <sup>1</sup>, Xiang Tao <sup>1</sup>, Xiu-Hong Mao <sup>1</sup>, Qing Hu <sup>1,\*</sup> and Shen Ji <sup>1,2,\*</sup>

<sup>1</sup> NMPA Key Laboratory for Quality Control of Traditional Chinese Medicine, Shanghai Institute for Food and Drug Control, 1500 Zhangheng Road, Shanghai 201203, China

<sup>2</sup> China State Institute of Pharmaceutical Industry, 285 Gebaini Road, Shanghai 201203, China

<sup>3</sup> Institute of Traditional Chinese Medicine, Hebei North University, 11 Diamond South Road, Zhangjiakou 075000, China

\* Correspondence: huqingyjs@163.com (Q.H.); jishen2013@163.com (S.J.)

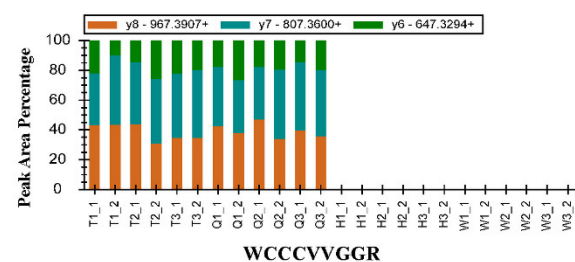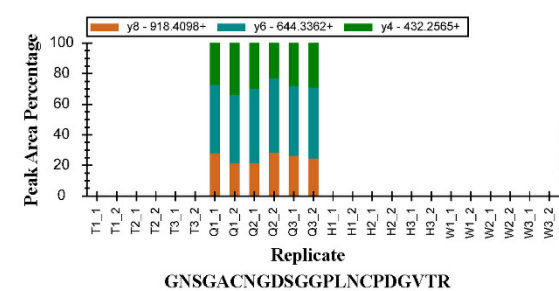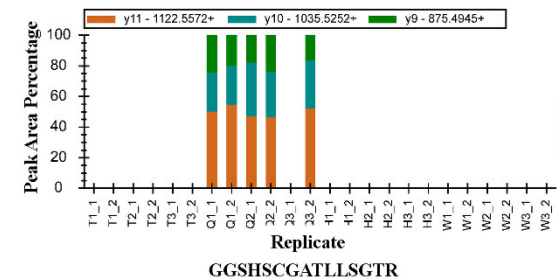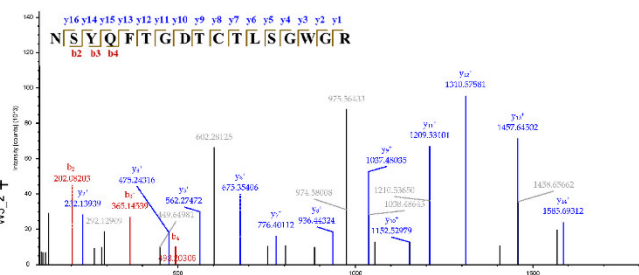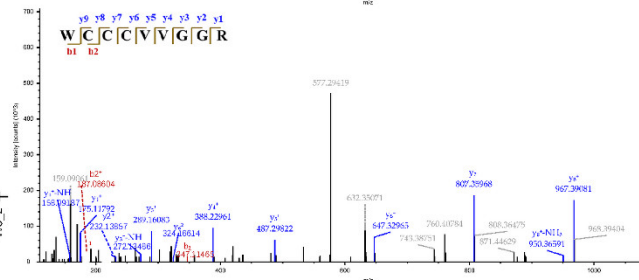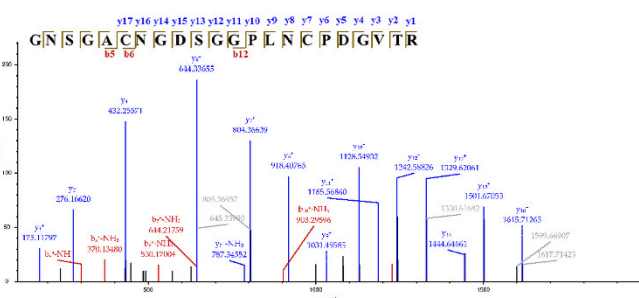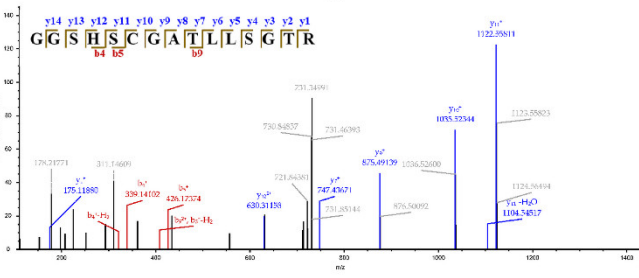

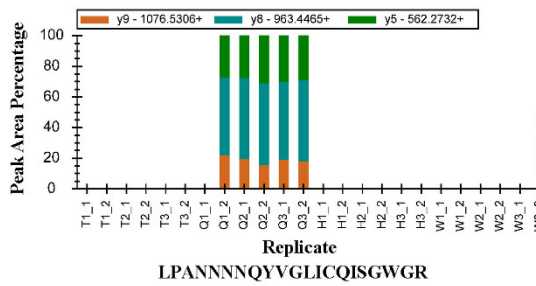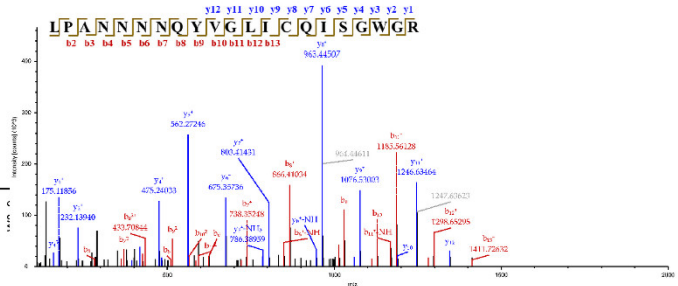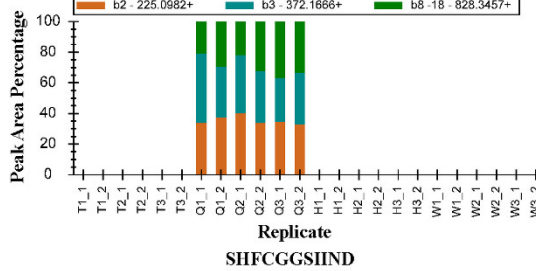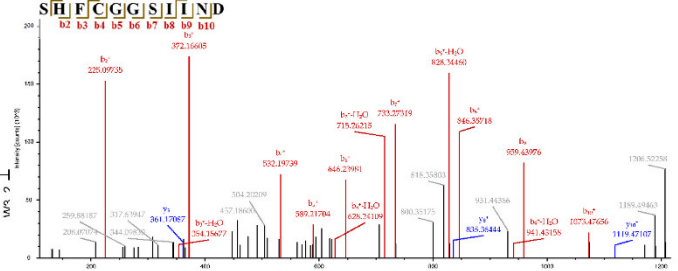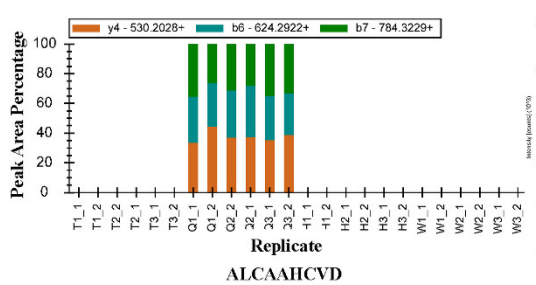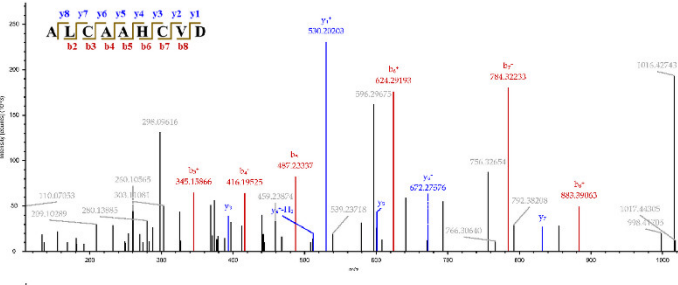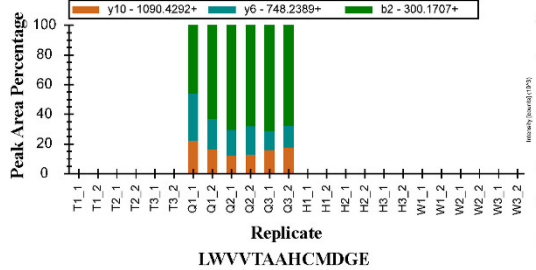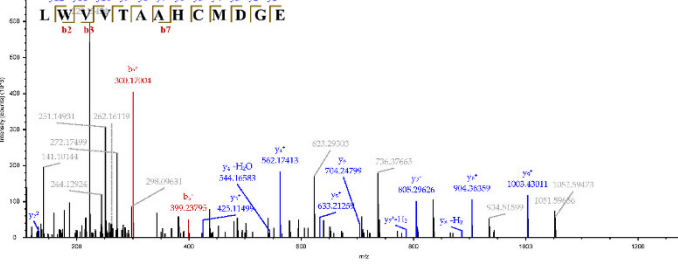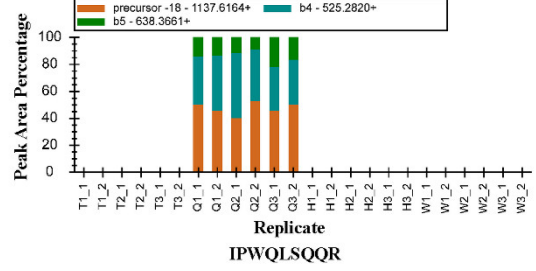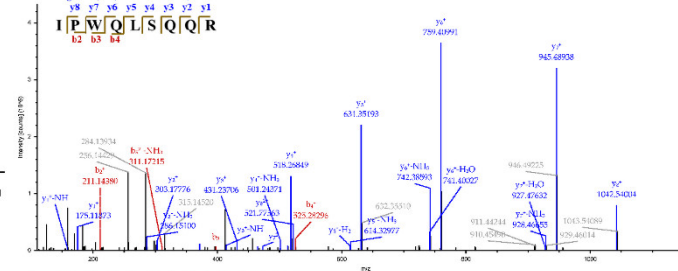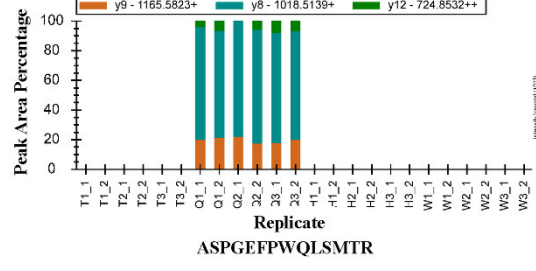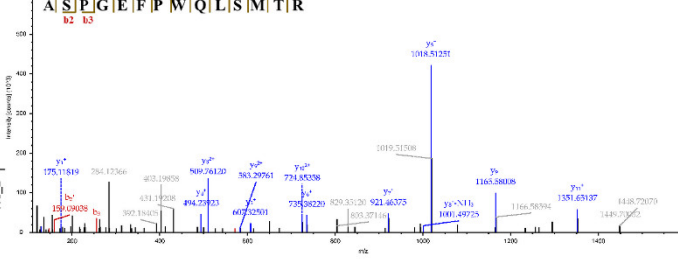

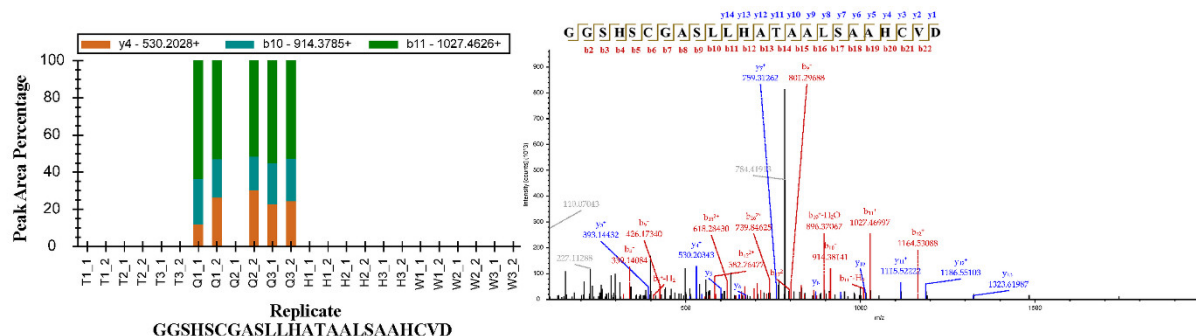

**Figure S1.** The signal distribution of 11 quality markers and the corresponding mass spectra in T, Q, H, and W samples. The raw data was processed using Skyline (Version 3.6.0) with the software settings according to the online tutorials ([https://skyline.ms/wiki/home/software/Skyline/page.view?name=tutorial\\_prm](https://skyline.ms/wiki/home/software/Skyline/page.view?name=tutorial_prm)). The peptide search results of DDA data from Proteome Discoverer analysis were used for spectral library building in skyline.

## Supplementary Materials tables

**Table S1.** Potential marker peptides associated with fibrinolytic activity of *P. aspergillum*.

| Compound                  | m/z       | t start (min) | t stop (min) |
|---------------------------|-----------|---------------|--------------|
| AGYNMLFVGIGGPLIPCR        | 688.6841  | 62            | 90           |
| ALCAAHCVD                 | 1016.4280 | 15            | 39           |
| ALCAAHCVDGALTSSLAVIAGLHNR | 645.0802  | 50            | 80           |
| ALCAAHCVDGALVSSLAVIAGLHNR | 859.1113  | 53            | 83           |
| ARPYEFPWQVSVR             | 817.9253  | 41            | 71           |
| ASPGFEPWQLSMTR            | 803.8867  | 49            | 79           |
| AVTAAHCSGSATGVYSLLGGTSDR  | 1169.5575 | 33            | 63           |
| CGGCTVIGGCR               | 598.7515  | 15            | 41           |
| DGTGSCDPSYPSVYTR          | 881.3718  | 30            | 60           |
| DGTWYQAGLTSGWVNVCK        | 1021.4744 | 54            | 84           |
| DSCQGDSCGPLSVK            | 703.8131  | 17            | 47           |
| DSCQGDSCGPLTVK            | 710.8217  | 16            | 46           |
| FALLPPDNVEQFVGFTCVLSGWGR  | 1355.1771 | 63            | 90           |
| FGGPLICPDFTE              | 676.8199  | 54            | 84           |
| FPWQLSLQR                 | 587.8216  | 55            | 85           |
| FPWQVSVR                  | 1018.5458 | 39            | 69           |
| FVVAGVTSWGISGGGACLPE      | 982.4819  | 61            | 90           |
| FVVAGVTSWGISGGGACLPEYPSVY | 1287.1221 | 63            | 90           |
| GACDGDFFGGPLICPDFTE       | 964.3948  | 57            | 87           |
| GANCDISGWGK               | 582.7578  | 21            | 51           |
| GEFPWQLSMTR               | 676.3255  | 48            | 78           |
| GGNCDISGWGK               | 575.7501  | 20            | 50           |
| GGPLIDPSK                 | 883.4875  | 15            | 45           |
| GGSHSCGASLLGSTHALCAAHCVD  | 809.0195  | 26            | 56           |
| GGSHSCGASLLHATAALSAHCVD   | 784.0259  | 30            | 60           |
| GGSHSCGASLLR              | 601.2902  | 15            | 38           |
| GGSHSCGASLLRPGSAL         | 813.9033  | 24            | 54           |
| GGSHSCGATLLSGTR           | 730.8484  | 15            | 44           |
| GGSHSCGATLLSSTR           | 745.8534  | 15            | 42           |
| GIHIPGSPFQFTVGPIVGGGPEK   | 764.4097  | 52            | 82           |

---

|                             |           |    |    |
|-----------------------------|-----------|----|----|
| GNSGACNGDSGGPLNCPDGVTR      | 721.3037  | 20 | 50 |
| GSVIAGVGSWVVR               | 643.8639  | 44 | 74 |
| IAILPPDNSYQFTGDTCTLSGWGR    | 890.4271  | 55 | 85 |
| IGIIGGTGLDNPDLQER           | 941.0075  | 48 | 78 |
| IPWQLSQQR                   | 1155.6233 | 29 | 59 |
| IVGGSAVSISDYPHQLSMR         | 1009.0125 | 35 | 65 |
| IVGGS DAGISYK               | 612.3160  | 20 | 50 |
| LATVSDGPFEGGNCDISGWGK       | 1083.9917 | 43 | 73 |
| LFDLHCVDHCVSK               | 592.9436  | 40 | 70 |
| LLSGITSWG VANCS PAWPSVYTR   | 841.4205  | 57 | 87 |
| LPANNNNQYVGLICQISGWGR       | 792.0611  | 58 | 88 |
| LSSGTWSHSCGATLLSAR          | 630.9751  | 30 | 60 |
| LWVVTA AHCM D               | 651.8015  | 38 | 68 |
| LWVVTA AHCM DGE             | 744.8336  | 41 | 71 |
| LWVVTA AHCM DGE SPAQVSIVAGE | 843.0689  | 52 | 82 |
| NSYQFTGDTCTLSGWGR           | 975.4261  | 41 | 71 |
| PGSALSA AHCV D              | 592.7712  | 15 | 45 |
| PGSALSA AHCV DGA PPADVR     | 649.9821  | 22 | 52 |
| PYEF PWQVSVR                | 1407.7057 | 49 | 79 |
| QFVGFTCVLSGWGR              | 807.3969  | 57 | 87 |
| QVVDTVVGGNPDR               | 678.3480  | 19 | 49 |
| QWIVTA AHCM DGEVPSQVSLVVGE  | 1306.6289 | 55 | 85 |
| SGGPLDSSGFE                 | 1052.4517 | 34 | 64 |
| SGGPLNCPDGVTR               | 665.3135  | 17 | 47 |
| SHFCGGS IIND                | 1206.5187 | 23 | 53 |
| SHFCGGS IINE                | 610.7713  | 24 | 54 |
| SHSCGASLLR                  | 544.2686  | 15 | 38 |
| SQCSGWGSLSSGGVCCPAVLR       | 742.3344  | 42 | 72 |
| SQCSGWGTLQSGGACCPD          | 964.3707  | 34 | 64 |
| SSDSHFCGGS IINE             | 755.3167  | 27 | 57 |
| SSWGV GASVLT K              | 596.3212  | 33 | 63 |
| STD SHFCGGS IIND            | 755.3162  | 26 | 56 |
| TCTLSGWGR                   | 1037.4817 | 23 | 53 |
| TLSGWGR                     | 776.4044  | 18 | 48 |
| VAGVTSWGISGQLGR             | 744.4013  | 39 | 69 |
| VGEIPWQLSQQR                | 720.8814  | 38 | 68 |
| VTGSHSCGASLISNTR            | 823.8975  | 15 | 42 |
| WCCCVVGGR                   | 577.2381  | 21 | 51 |
| YGLSASHCV DGATADILR         | 635.9749  | 33 | 63 |
| FPGQQIIGGELK                | 643.8588  | 49 | 64 |
| SWGIGASATTR                 | 553.7827  | 32 | 47 |
| SWGIGATASTR                 | 553.7827  | 32 | 47 |
| YHFHYRPHEPGVYLLNVK          | 757.0596  | 38 | 53 |

---

**Table S2.** Blast results of matched proteins in UniProtKB

| Matched Proteins Accession          | Lumbrokinase Name /Accession a                       | Identity (%) |
|-------------------------------------|------------------------------------------------------|--------------|
| TRINITY_DN78691_c1_g2_i2::g.671430  | Fibrinolytic enzyme (Enchytraeus japonensis) /H1A7B6 | 60.5         |
| TRINITY_DN109923_c9_g2_i1::g.21772  | Lumbrokinase (Eisenia fetida) /H1A7B5                | 62.7         |
| TRINITY_DN94857_c2_g1_i9::g.607734  | Fibrinolytic enzyme (Enchytraeus japonensis) /H1A7B6 | 55.2         |
| TRINITY_DN94857_c2_g1_i6::g.607728  | Lumbrokinase (Eisenia fetida) /A8ILP1                | 51.5         |
| TRINITY_DN84311_c4_g1_i3::g.903727  | Lumbrokinase (Eisenia fetida) /A8ILP1                | 68.6         |
| TRINITY_DN84311_c4_g1_i4::g.903729  | Lumbrokinase (Eisenia fetida) /Q5MBA0                | 68.6         |
| TRINITY_DN84311_c4_g1_i6::g.903732  | Lumbrokinase-6 (Eisenia fetida) /Q6T373              | 65.4         |
| TRINITY_DN84311_c4_g1_i7::g.903735  | Lumbrokinase-6 (Eisenia fetida) /Q6T373              | 67.9         |
| TRINITY_DN83697_c1_g5_i1::g.656593  | Lumbrokinase (Eisenia fetida) /A8ILP4                | 68.2         |
| TRINITY_DN102309_c1_g2_i5::g.177583 | Lumbrokinase (Perionyx excavatus) /A0A068B4B1        | 76.1         |
| TRINITY_DN102309_c1_g2_i1::g.177575 | Lumbrokinase (Eisenia fetida) /Q6DKQ2                | 76.2         |
| TRINITY_DN83697_c1_g1_i5::g.656587  | Lumbrokinase (Eisenia fetida) /A8ILP1                | 68.9         |

a: Lumbrokinase with the highest matched identity degree in UniProtKB
